# Supplementary material for: Gender-affirming hormonal therapy induces a gender-concordant fecal metagenome transition in transgender individuals
Source: Springer Nature journal article supplement (doi:10.1186/s12916-024-03548-z), 2024-09-01
Supplement: MOESM1 [file 12916_2024_3548_MOESM1_ESM.pdf]

**Wie oft verzehren Sie folgende Lebensmittel und Getränke?**

[illegible]

## How often do you consume the following items?

|                                           | Several<br>times a<br>day | Every<br>day | Several<br>times a<br>week | Several<br>times a<br>moth | About<br>once a<br>months | Never | Comment |
|-------------------------------------------|---------------------------|--------------|----------------------------|----------------------------|---------------------------|-------|---------|
| Milk, buttermilk                          |                           |              |                            |                            |                           |       |         |
| Quark (curd),<br>yogurt, sour milk        |                           |              |                            |                            |                           |       |         |
| Cream, crème<br>fraîche                   |                           |              |                            |                            |                           |       |         |
| Cheese                                    |                           |              |                            |                            |                           |       |         |
| Eggs                                      |                           |              |                            |                            |                           |       |         |
| Meat (without<br>sausages)                |                           |              |                            |                            |                           |       |         |
| Sausages, ham                             |                           |              |                            |                            |                           |       |         |
| Poultry, game                             |                           |              |                            |                            |                           |       |         |
| Fish                                      |                           |              |                            |                            |                           |       |         |
| Vegetables,<br>cooked                     |                           |              |                            |                            |                           |       |         |
| Legumes<br>(e.g. beans,<br>lentils, peas) |                           |              |                            |                            |                           |       |         |
| Salads, raw<br>vegetables                 |                           |              |                            |                            |                           |       |         |
| Fresh herbs                               |                           |              |                            |                            |                           |       |         |
| Fresh fruit                               |                           |              |                            |                            |                           |       |         |
| Potatoes                                  |                           |              |                            |                            |                           |       |         |
| White pasta<br>(noodles,<br>spaetzle)     |                           |              |                            |                            |                           |       |         |
| White rice                                |                           |              |                            |                            |                           |       |         |
| Whole grain rice,<br>whole grain pasta    |                           |              |                            |                            |                           |       |         |
| Dumplings<br>(potato, bread<br>dumplings) |                           |              |                            |                            |                           |       |         |
| French fries, fried<br>potatoes           |                           |              |                            |                            |                           |       |         |
| Pastries as main<br>dishes                |                           |              |                            |                            |                           |       |         |
| Oatmeal, muesli,<br>cornflakes            |                           |              |                            |                            |                           |       |         |
| White bread,<br>rolls, toast              |                           |              |                            |                            |                           |       |         |
| Mixed bread                               |                           |              |                            |                            |                           |       |         |
| Whole grain<br>bread, rolls               |                           |              |                            |                            |                           |       |         |
| Crispbread                                |                           |              |                            |                            |                           |       |         |
| Cakes, tarts,<br>pastries                 |                           |              |                            |                            |                           |       |         |
| Honey, jam,<br>nougat cream               |                           |              |                            |                            |                           |       |         |
| Chocolate,<br>pralines                    |                           |              |                            |                            |                           |       |         |

## How often do you consume the following items?

|                                          |  |  |  |  |  |  |  |
|------------------------------------------|--|--|--|--|--|--|--|
| Other sweets<br>(e.g. candies)           |  |  |  |  |  |  |  |
| Salty snacks<br>(e.g. chips,<br>peanuts) |  |  |  |  |  |  |  |
| Fruit and<br>vegetable juices            |  |  |  |  |  |  |  |
| Mineral water,<br>tap water              |  |  |  |  |  |  |  |
| Herbal, fruit tea                        |  |  |  |  |  |  |  |
| Coffee, black tea                        |  |  |  |  |  |  |  |
| Lemonade, cola<br>drinks                 |  |  |  |  |  |  |  |
| Beer                                     |  |  |  |  |  |  |  |
| Wine                                     |  |  |  |  |  |  |  |
| Spirits                                  |  |  |  |  |  |  |  |
| Diet drinks                              |  |  |  |  |  |  |  |
